# Supplementary material
Source: PubMed Central journal article supplement (PMC5477221)
Supplement: CJN.10771016SupplementaryData.pdf [file CJN.10771016SupplementaryData.pdf]

## Contributing Authors:

Jeffrey Perl<sup>1</sup>, Laura M. Dember<sup>2</sup>, Joanne M Bargman<sup>1</sup>, Teri Browne<sup>3</sup>, David M Charytan<sup>4</sup>, Jennifer E. Flythe<sup>5</sup>, LaTonya J Hickson<sup>6</sup>, Adriana M Hung<sup>7</sup>, Michel Jadoul<sup>8</sup>, Timmy Chang Lee<sup>9</sup>, Klemens B. Meyer<sup>10</sup>, Hamid Moradi<sup>11</sup>, Tariq Shafi<sup>12</sup>, Isaac Teitelbaum<sup>13</sup>, Leslie Wong<sup>14</sup>, Christopher T Chan<sup>1</sup> On Behalf of the ASN – Dialysis Advisory Group

<sup>1</sup>University of Toronto, Department of Medicine, Division of Nephrology, Ontario, Canada, <sup>2</sup> Perelman School of Medicine, University of Pennsylvania Department of Medicine, Division of Nephrology , Philadelphia, PA, <sup>3</sup> University of South Carolina College of Social Work, Columbia, SC, <sup>4</sup> Harvard Medical School, Brigham & Women's Hospital, Boston, MA, <sup>5</sup> University of North Carolina, UNC Kidney Center, Chapel Hill, NC, <sup>6</sup>Mayo Clinic, Rochester, MN, <sup>7</sup>Vanderbilt University School of Medicine, Nashville TN, <sup>8</sup> Université Catholique de Louvain, Brussels, Belgium, <sup>9</sup>University of Alabama, <sup>10</sup> Tufts Medical Center, Boston, MA, <sup>11</sup> University of California, Irvine, <sup>12</sup>John Hopkins School of Medicine, Baltimore, MD, <sup>13</sup>University of Colorado, Aurora, CO, <sup>14</sup> Department of Nephrology and Hypertension Cleveland Clinic, Cleveland, OH
